# Supplementary material
Source: PubMed Central journal article supplement (PMC4300280)
Supplement: NIHMS642766-supplement-1.pdf [file NIHMS642766-supplement-1.pdf]

# Supplemental Figure 1
