# Supplementary material
Source: PubMed Central journal article supplement (PMC4300280)

# Supplemental Figure 2

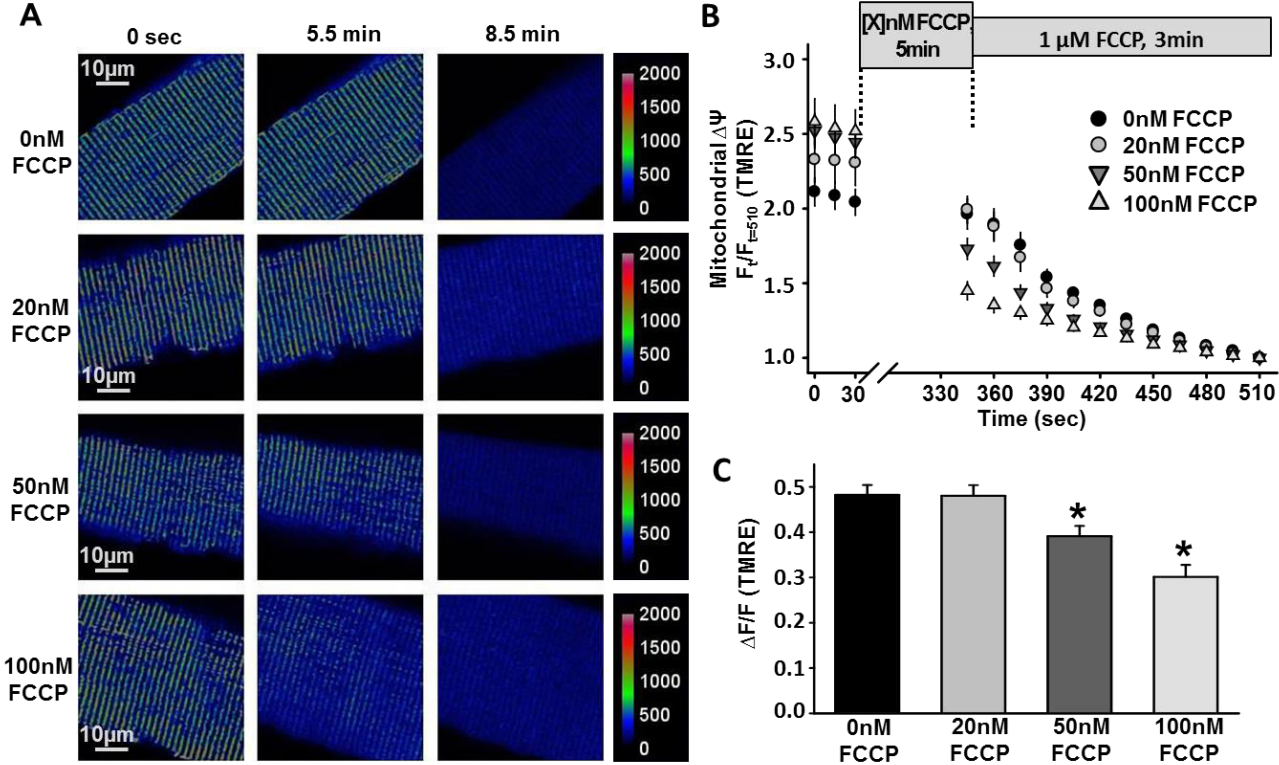

Supplement: NIHMS642766-supplement-2.pdf [file NIHMS642766-supplement-2.pdf]
